# Supplementary material for: Multifunctional MgAl LDH/Zn-MOF S-scheme heterojunction: efficient hydrogen production, methyl red removal, and CO2 adsorption
Source: Royal Society of Chemistry journal article supplement (doi:10.1039/d4ma00038b), 2024-01-01
Supplement: d4ma00038b1.pdf [file d4ma00038b1.pdf]

## Supporting Information

### Multifunctional MgAl LDH/Zn-MOF S-scheme heterojunction: efficient hydrogen production, methyl red removal, and CO<sub>2</sub> adsorption

Ihsan Maseeh<sup>‡a</sup>, Farheen Anwar<sup>‡a</sup>, Sadia Aroob<sup>a</sup>, Tariq Javed<sup>b</sup>, Ismat Bibi<sup>a</sup>, Afaf Almasoudi<sup>c</sup>, Ahmad Raheel<sup>d</sup>, Muhammad Arshad Javid<sup>e</sup>, Sónia A. C. Carabineiro<sup>f</sup>, Muhammad Babar Taj<sup>\*a</sup>

<sup>a</sup> Institute of Chemistry, The Islamia University of Bahawalpur, Bahawalpur 63100, Pakistan

<sup>b</sup> Department of Chemistry, University of Sahiwal, Sahiwal 57000, Pakistan

<sup>c</sup> Chemistry Department, Faculty of Science, King Abdulaziz University, P.O. Box 42734, Jeddah, Saudi Arabia

<sup>d</sup> Department of Chemistry, Quaid-e-Azam University, Islamabad 44000, Pakistan

<sup>e</sup> Institute of Physics, The Islamia University Bahawalpur, Bahawalpur 63100, Pakistan

<sup>f</sup> LAQV-REQUIMTE, Department of Chemistry, NOVA School of Science and Technology, Universidade NOVA de Lisboa, 2829-516 Caparica, Portugal

<sup>‡</sup>Both authors have equal contributions, so they are considered first authors.

\*Corresponding authors: dr.taj@iub.edu.pk (M.B.T.)

#### Section S1

##### 1. Kinetic studies

For the kinetic studies, 25 ml of MR dye solution was placed in a flask, followed by the addition of 25 mg of MgAl LDH/Zn-MOF adsorbent. The mixture was continuously stirred for 4 h, and samples were collected at 20-min intervals to measure the concentration of the dye solution. To study the adsorption kinetics, the experimental data was fitted to various kinetic models, including pseudo-first-order kinetics, Eq. 1<sup>1,2</sup>, pseudo-second-order kinetics, Eq. 2<sup>2,3</sup>, liquid-film diffusion model, Eq. 3<sup>4</sup>, and intra-particle diffusion model, Eq. 4<sup>4</sup> as follows:

$$K_1 = \ln q_e - \ln(q_e - q_t)/t \quad (1)$$

Where  $t$  is the adsorption time,  $q_e$  is the adsorption capacity at equilibrium (mg/g),  $q_t$  is the adsorption capacity at time  $t$  (mg/g),  $K_1$  is the rate constant for pseudo-first-order kinetics ( $h^{-1}$ ). The data can be plotted as  $\ln(q_e - q_t)$  vs time.

$$K_2 = q_t/t (1/q_e^2 + t/q_e) \quad (2)$$

$K_2$  is the rate constant for the pseudo-second-order kinetics ( $g\ mg^{-1}\ h^{-1}$ ). For this model, the data can be plotted as  $t/q_t$  vs time.

$$K_f = A - \ln(1 - q_t/q_e)/t \quad (3)$$

$K_f$  is the rate constant for the liquid-film diffusion model ( $h^{-1}$ ). The data can be plotted as  $\ln(1 - q_e/q_t)$  vs time.

$$K_d = q_t - C/t_{0.5} \quad (4)$$

$K_d$  is the rate constant for the intra-particle diffusion model ( $\text{g}\cdot\text{mg}^{-1}\cdot\text{h}^{-0.5}$ ). For this, data can be plotted as  $q_t/t_{0.5}$  for this model.

## 2. Isotherm Models

After analysis of the kinetics mechanisms, various isothermal models were applied to the data, including the Langmuir (Eq. 5)<sup>4</sup>, Freundlich (Eq. 6)<sup>5</sup>, and Temkin (Eq. 7)<sup>6</sup> models.

The Langmuir model describes the adsorption process of a monolayer of molecules onto a surface with a limited number of identical sites. This model assumes that the adsorption occurs at specific homogeneous sites within the absorbent and that there is no transmigration of the adsorbate in the plane of the surface. The Langmuir equation is given by:

$$C_e/q_e = C_e/q_{\max} + 1/q_{\max} K_L \quad (5)$$

Here,  $C_e$  is the equilibrium concentration of adsorbate ( $\text{mg/l}$ ),  $q_e$  is the equilibrium adsorption capacity ( $\text{mg/g}$ ),  $q_{\max}$  is the maximum adsorption capacity ( $\text{mg/g}$ ), and  $K_L$  is the Langmuir adsorption constant ( $\text{l/mg}$ ). A plot of  $C_e/q_e$  vs  $C_e$  is used to evaluate the Langmuir model.

The Freundlich model is a semi-empirical isotherm model that describes the adsorption process onto heterogeneous surfaces. The Freundlich equation is given as follows:

$$\ln q_e = 1/n \ln C_e + \ln K_F \quad (6)$$

Here,  $K_F$  is the Freundlich adsorption constant, and  $n$  is the Freundlich exponent, which characterizes the heterogeneity of the adsorbent surface. A plot of  $\ln q_e$  vs  $\ln C_e$  is used to evaluate the Freundlich model.

The Temkin model assumes that the heat of adsorption of all the molecules in the layer decreases linearly with coverage due to adsorbent-adsorbate interactions. The Temkin equation is given as follows:

$$q_e = K_T \ln C_e + K_T \ln f \quad (7)$$

Here,  $K_T$  is the Temkin binding constant ( $\text{l/mg}$ ), and  $f$  is the Temkin isotherm constant related to the heat of adsorption. A  $q_e$  vs  $\ln C_e$  plot is used to evaluate the Temkin model.

## 3. Thermodynamic Study

The thermodynamic study was conducted at different temperatures (303 K, 313 K, 323 K, 333 K and 343 K) by adding 25 mg of adsorbent to 25 ml of MR dye solution ( $5 \times 10^{-5} \text{ M}$ ) and stirring continuously for 3 h. Various thermodynamic parameters were calculated using the following equations (8-10).

$$\Delta G_o = -RT \ln K_L \quad (8)$$

$$\Delta H_o = -\text{slope} \times R \quad (9)$$

$$\Delta S_o = -\text{intercept} \times R \quad (10)$$

Here,  $\Delta G_o$  represents the change in Gibbs free energy ( $\text{kJ/mol}$ ),  $R$  is the universal gas constant with a value of  $8.314 \text{ J/mol}\cdot\text{K}$ ,  $T$  is the absolute temperature ( $\text{K}$ ),  $K_L$  is the equilibrium constant,  $\Delta S_o$  represents the change in entropy ( $\text{kJ/mol}\cdot\text{K}$ ), and  $\Delta H_o$  represents the change in enthalpy ( $\text{kJ/mol}$ )

Figures:

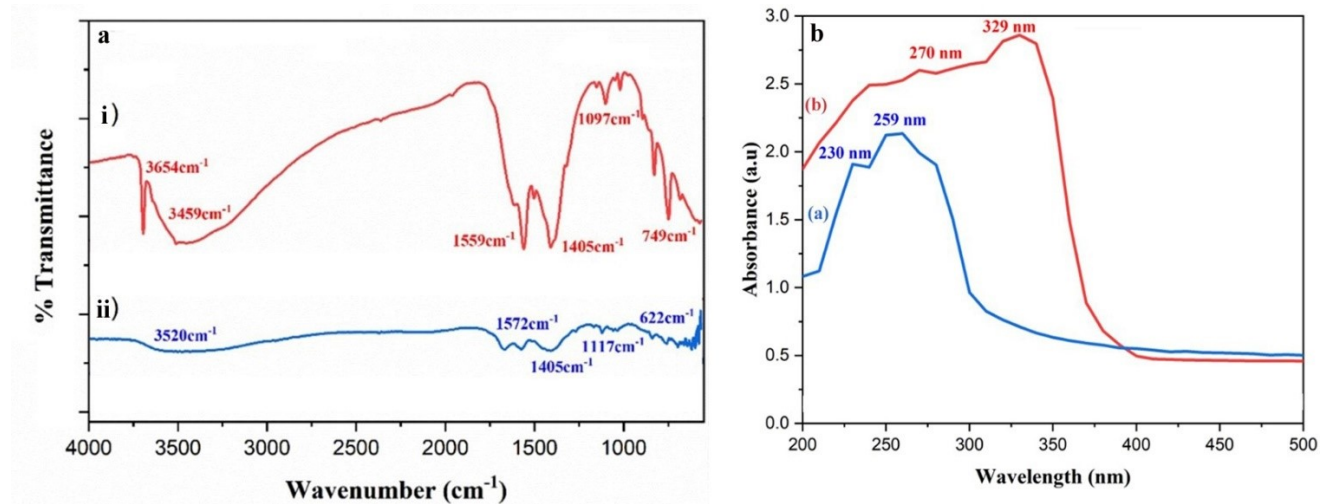

**Figure S1:** (a) FTIR spectra of the prepared (i) MgAl LDH and (ii) MgAl-LDH/Zn-MOF samples, (b) UV-vis spectra of the prepared (i) MgAl LDH and (ii) MgAl-LDH/Zn-MOF samples.

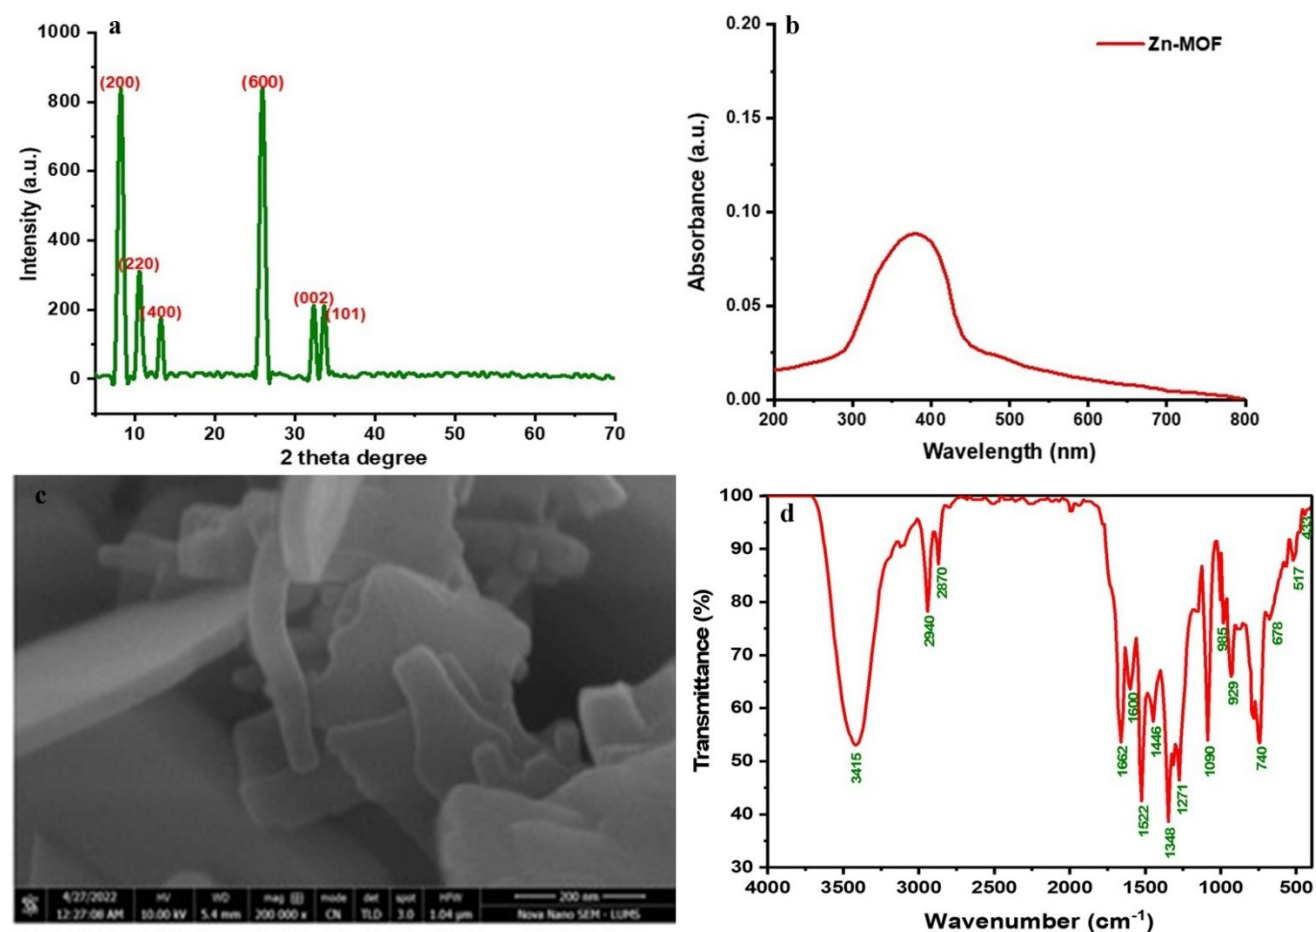

**Figure S2:** (a) PXRD spectrum (b) UV-vis spectrum (c) SEM image, and (d) FTIR spectrum of Zn-MOF.

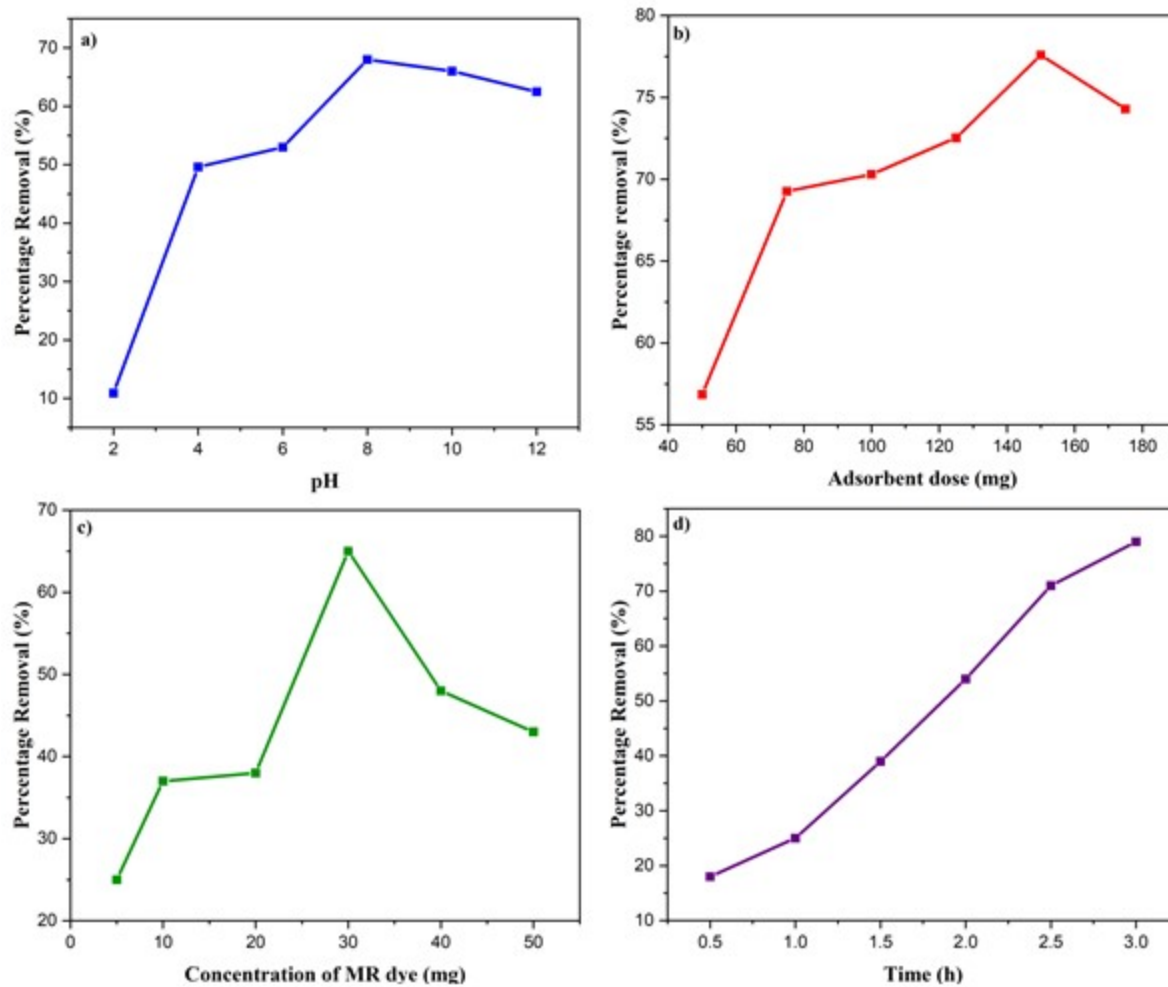

**Figure S3:** Comparative graphs for adsorption of MR dye at different (a) pH, (b) adsorbent dose, (c) concentration of dye, and (d) time.

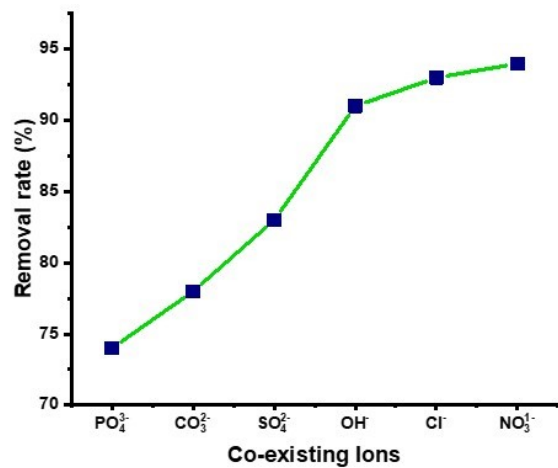

**Figure S4:** Effect of co-existing ions in the removal of MR dye.

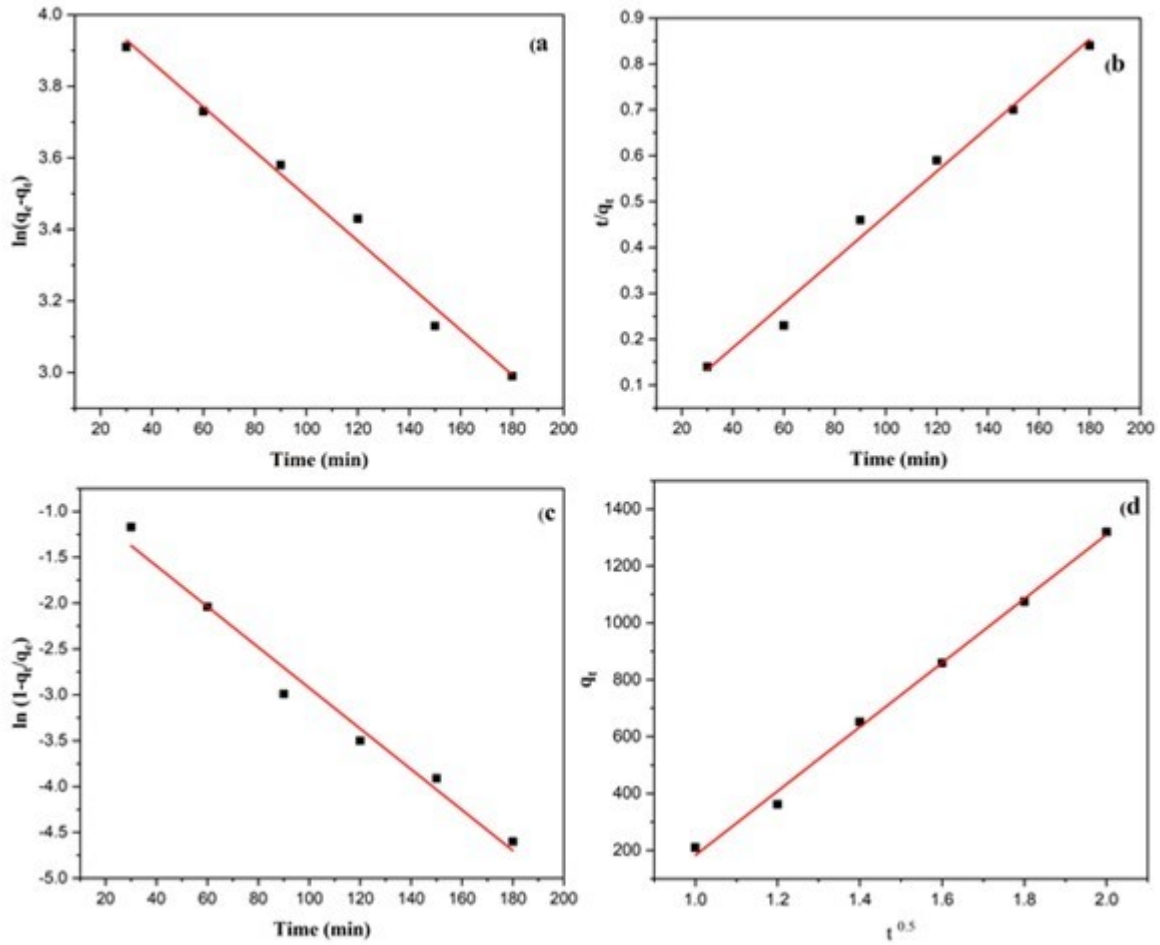

**Figure S5:** Kinetic models for the adsorption of MR dye on MgAl LDH/Zn-MOF (a) pseudo-first order kinetics, (b) pseudo-second-order kinetics, (c) liquid-film diffusion model, and (d) intra-particle diffusion model.

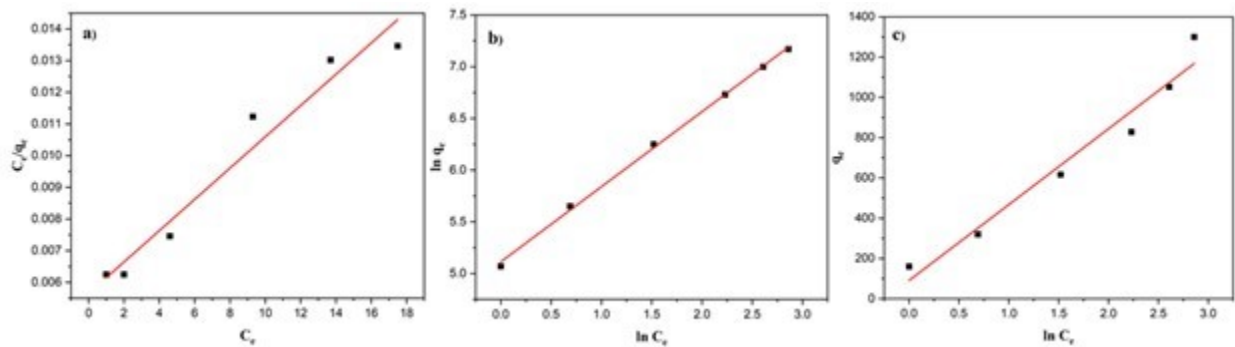

**Figure S6:** Adsorption isotherms for MR dye on MgAl LDH/Zn-MOF (a) Langmuir, (b) Freundlich, and (c) Temkin models.

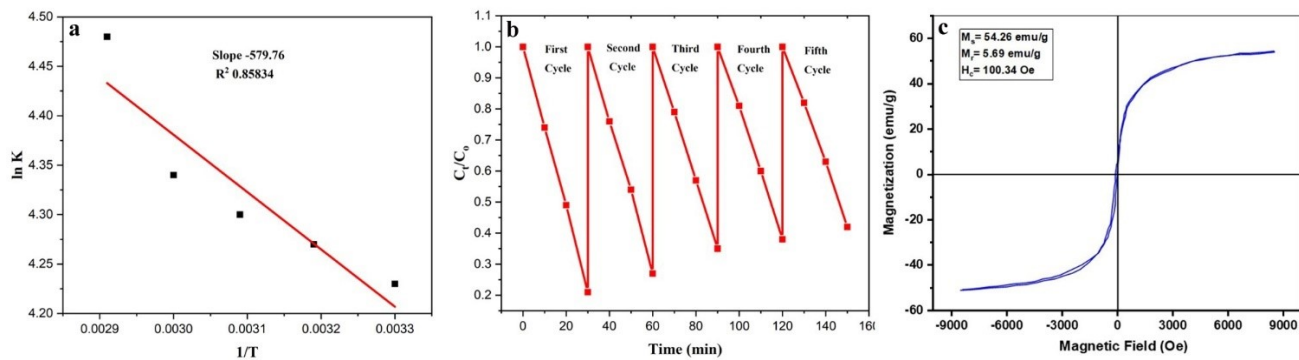

**Figure S7:** (a) Plot between  $\ln K$  and  $1/T$  for the thermodynamic study of adsorption (b) Reusability of MgAl LDH/Zn-MOF in the cyclic removal of MR dye under adsorption conditions:  $\text{pH} = 8$ ,  $C_0 = 5 \times 10^{-5}$  M,  $T = 25$  °C, and  $t = 150$  min, (c) VSM analysis of the MgAl LDH/Zn-MOF.

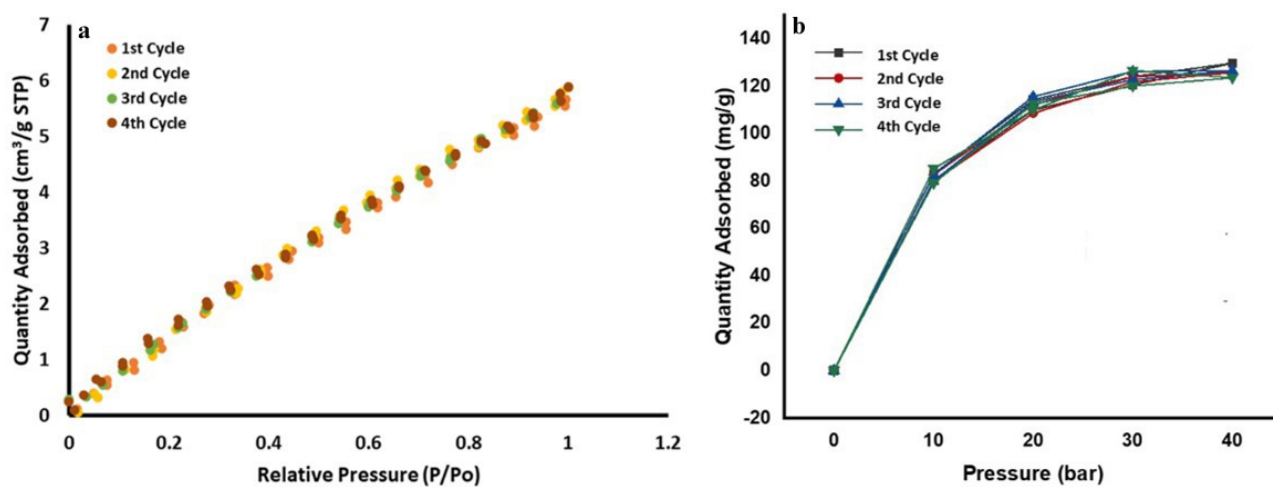

**Figure S8:** (a) Cyclic adsorption isotherms up to 1 bar at 25 °C and (b) the cyclic  $\text{CO}_2$  uptake of MgAl LDH/Zn-MOF at high pressure of 40 bar.

## Tables

**Table S1:** Comparison of the hydrogen production rate of MgAl LDH/Zn-MOF with other MOFs in the literature.

| Photocatalyst                           | Sacrificial reagent     | Irradiation source             | H <sub>2</sub> production rate              | Reference     |
|-----------------------------------------|-------------------------|--------------------------------|---------------------------------------------|---------------|
| MgAl LDH/Zn-MOF                         | 10 vol% triethanolamine | direct solar irradiation       | 23000 $\mu\text{mol g}^{-1} \text{h}^{-1}$  | Present study |
| MOF-199/Ni                              | ---                     | 300 W Xe lamp                  | 24 400 $\mu\text{mol h}^{-1} \text{g}^{-1}$ | 7             |
| MgAl-LDH coupled with CoSx              | 10 vol% triethanolamine | simulated sunlight irradiation | 263 $\mu\text{mol g}^{-1} \text{h}^{-1}$    | 8             |
| ZIF-67@NiAl LDH                         | 15 vol% triethanolamine | 5W LED                         | 2900 $\mu\text{mol g}^{-1} \text{h}^{-1}$   | 9             |
| CoAl LDH@Ni-MOF-74                      | 15 vol% triethanolamine | 5W LED                         | 213 $\mu\text{mol g}^{-1} \text{h}^{-1}$    | 10            |
| Co-Ru@MOF                               | ---                     | ---                            | 15,144 $\text{ml min}^{-1} \text{g}^{-1}$   | 11            |
| MIL-167/MIL-125-NH <sub>2</sub>         | 10 ml triethylamine     | visible light                  | 455 $\mu\text{mol g}^{-1} \text{h}^{-1}$    | 12            |
| Pt(4.38 wt%)/CuII-MOF                   | 5 ml triethylamine      | 300 W Xe lamp                  | 2.51 $\mu\text{mol g}^{-1} \text{h}^{-1}$   | 13            |
| Cu-MOF/CeO <sub>2</sub>                 | ---                     | electrochemical                | 97.9 $\mu\text{g ml}^{-1}$                  | 14            |
| Pt/PCN-777                              | benzylamine             | light irradiation              | 568 $\mu\text{mol g}^{-1} \text{h}^{-1}$    | 15            |
| g-C <sub>3</sub> N <sub>4</sub> /ZIF-67 | lactic acid             | visible light                  | 3329 $\mu\text{mol g}^{-1} \text{h}^{-1}$   | 16            |
| Ni/Cu-BTC                               | methanol                | visible light                  | 200 $\text{mmol.h}^{-1}$                    | 17            |

**Table S2.** Comparative study for adsorption of MR dye on different adsorbents.

| Nanocomposites                                | Preparation Method                        | Dye | Removal Rate | References    |
|-----------------------------------------------|-------------------------------------------|-----|--------------|---------------|
| MgAl LDH/Zn-MOF                               | Co-precipitation followed by hydrothermal | MR  | 97%          | Current Study |
| NaAlg-g-CHIT/nZVI                             | Co-precipitation                          | MR  | 66%          | 18            |
| bentonite / chitosan                          | Precipitation                             | MR  | 96%          | 19            |
| NiO@HT-derived C                              | Precipitation                             | MR  | 94%          | 20            |
| MgFe <sub>2</sub> O <sub>4</sub> /polyaniline | Co-precipitation                          | MR  | 90%          | 21            |
| Ag@Fe nanocomposite                           | Co-precipitation                          | MR  | 93%          | 22            |
| $\alpha$ -MnO <sub>2</sub> /PANI hybrid       | Polymerization                            | MR  | 95%          | 23            |
| CuO-HNT                                       | Calcination                               | MR  | 98%          | 24            |

**Table S3.** Kinetic values for pseudo-first-order kinetics, pseudo-second-order kinetics, liquid-film diffusion, and intra-particle diffusion models.

| Parameters       | Pseudo-First Order Kinetics | Pseudo-Second Order Kinetics | Liquid Film Diffusion Model | Intra particle Diffusion Model |
|------------------|-----------------------------|------------------------------|-----------------------------|--------------------------------|
| R <sup>2</sup>   | 0.988                       | 0.987                        | 0.979                       | 0.996                          |
| Kinetic Constant | K <sub>1</sub> =0.7         | K <sub>2</sub> =330.99       | K <sub>f</sub> =9.80        | K <sub>d</sub> =84.88          |

**Table S4.** Isothermal parameters for Langmuir, Freundlich, and Temkin models.

| Parameters       | Langmuir Model       | Freundlich Model     | Temkin Model            |
|------------------|----------------------|----------------------|-------------------------|
| R <sup>2</sup>   | 0.998                | 0.957                | 0.952                   |
| Kinetic Constant | K <sub>L</sub> =1.05 | K <sub>F</sub> =0.71 | K <sub>T</sub> =1746.75 |

**Table S5.** Thermodynamic parameters for adsorption of MR dye on MgAl LDH/Zn-MOF.

| Dye | Temperature (K) | K <sub>L</sub> (L mg <sup>-1</sup> ) | ΔG (kJmol <sup>-1</sup> K) | ΔH (kJmol <sup>-1</sup> ) | ΔS (kJmol <sup>-1</sup> K) | R <sup>2</sup> |
|-----|-----------------|--------------------------------------|----------------------------|---------------------------|----------------------------|----------------|
| MR  | 303             | 69.24                                | -11286.16                  | 4893.97                   | 50.88                      | 0.8438         |
|     | 313             | 71.61                                |                            |                           |                            |                |
|     | 323             | 74.28                                |                            |                           |                            |                |
|     | 333             | 76.78                                |                            |                           |                            |                |
|     | 343             | 89.03                                |                            |                           |                            |                |

**Table S6.** Comparison of CO<sub>2</sub> uptake of MgAl LDH/Zn-MOF with other MOFs in the literature

| Material                  | BET surface area (m <sup>2</sup> g <sup>-1</sup> ) | CO <sub>2</sub> uptake              | References    |
|---------------------------|----------------------------------------------------|-------------------------------------|---------------|
| MgAl LDH/Zn-MOF           | 60                                                 | 129 mgg <sup>-1</sup>               | Current study |
| [BMPyr][Cl]/AlTp          | 578.35                                             | 68.27 mgg <sup>-1</sup>             | 25            |
| Zn-MOF                    | ---                                                | 145 mgg <sup>-1</sup>               | 26            |
| MgCl <sub>2</sub> -MOF-74 | 928                                                | 7.8 mmolg <sup>-1</sup>             | 27            |
| Cu-TDPAT                  | 1938                                               | 132 cm <sup>3</sup> g <sup>-1</sup> | 28            |
| MOP-(Cu II)               | --                                                 | 121 mmolg <sup>-1</sup>             | 29            |
| Mg/DOBDC                  | --                                                 | 250 mgg <sup>-1</sup>               | 30            |
| Ni/DOBDC                  | --                                                 | 2.4 mmolg <sup>-1</sup>             | 31            |
| ZIF-8/PAN-90              | 888                                                | 130 mgg <sup>-1</sup>               | 32            |
| IRMOF-74                  | 2440                                               | 3.2 mmolg <sup>-1</sup>             | 33            |
| Mg-MOF-74 -TEPA           | 1628                                               | 26.9 wt%                            | 34            |
| GO@MOF-505                | 1279                                               | 3.94 mmolg <sup>-1</sup>            | 35            |
| GrO@Cu-BTC                | 1677                                               | 8.19 mmolg <sup>-1</sup>            | 36            |

## References

1. S. Li, X. Zhang and Y. Huang, *Journal of hazardous materials*, 2017, **321**, 711-719.
2. Y. Sun, X. Wang, W. Song, S. Lu, C. Chen and X. Wang, *Environmental science: nano*, 2017, **4**, 222-232.
3. M. A. Afzal, M. Javed, S. Aroob, T. Javed, M. M. Alnoman, W. Alelwani, I. Bibi, M. Sharif, M. Saleem and M. Rizwan, *Nanomaterials*, 2023, **13**, 2079.
4. S. Zhu, S. Jiao, Z. Liu, G. Pang and S. Feng, *Environmental science: nano*, 2014, **1**, 172-180.
5. S. Aroob, S. A. Carabineiro, M. B. Taj, I. Bibi, A. Raheel, T. Javed, R. Yahya, W. Alelwani, F. Verpoort and K. Kamwilaisak, *Catalysts*, 2023, **13**, 502.
6. S. Aroob, M. B. Taj, S. Shabbir, M. Imran, R. H. Ahmad, S. Habib, A. Raheel, M. N. Akhtar, M. Ashfaq and M. Sillanpää, *Journal of Environmental Chemical Engineering*, 2021, **9**, 105590.
7. J. Zhao, Y. Wang, J. Zhou, P. Qi, S. Li, K. Zhang, X. Feng, B. Wang and C. Hu, *Journal of Materials Chemistry A*, 2016, **4**, 7174-7177.
8. X. Liu, J. Xu, L. Ma, Y. Liu and L. Hu, *Chemical Physics Letters*, 2021, **784**, 139124.
9. K. Wang, S. Liu, Y. Li, G. Wang, M. Yang and Z. Jin, *Applied Surface Science*, 2022, **601**, 154174.
10. Z. Jin, Y. Li and Q. Ma, *Transactions of Tianjin University*, 2021, **27**, 127-138.



11. E. Onat, S. Cevik, Ö. Şahin, S. Horoz and M. S. Izgi, *Journal of the Australian Ceramic Society*, 2021, **57**, 1389-1395.
12. S. Kampouri, F. M. Ebrahim, M. Fumanal, M. Nord, P. A. Schouwink, R. Elzein, R. Addou, G. S. Herman, B. Smit and C. P. Ireland, *ACS Applied Materials & Interfaces*, 2021, **13**, 14239-14247.
13. L. Li, Y. Zhao, Q. Wang, Z.-Y. Liu, X.-G. Wang, E.-C. Yang and X.-J. Zhao, *Inorganic Chemistry Frontiers*, 2021, **8**, 3556-3565.
14. S. Kumaraguru, R. Nivetha, K. Gopinath, E. Sundaravadivel, B. O. Almutairi, M. H. Almutairi, S. Mahboob, M. Kavipriya, M. Nicoletti and M. Govindarajan, *Journal of Materials Research and Technology*, 2022, **18**, 1732-1745.
15. H. Liu, C. Xu, D. Li and H. L. Jiang, *Angewandte Chemie*, 2018, **130**, 5477-5481.
16. K. Devarayapalli, S. P. Vattikuti, T. Sreekanth, K. S. Yoo, P. Nagajyothi and J. Shim, *Applied Organometallic Chemistry*, 2020, **34**, e5376.
17. A. S. Morshedy, H. M. Abd El Salam, A. M. El Naggar and T. Zaki, *Energy & Fuels*, 2020, **34**, 11660-11669.
18. J. K. Adusei, E. S. Agorku, R. B. Voegborlo, F. K. Ampong, B. Y. Danu and F. A. Amarh, *Scientific African*, 2022, **17**, e01273.
19. P. Xiang, C. Deng, L. Liu and Y. Huang, 2020.
20. A. S. Ahmed, M. M. Sanad, A. Kotb, A. N. Negm and M. H. Abdallah, *Materials Advances*, 2023, **4**, 2981-2990.
21. P. Das and A. Debnath, *Journal of Dispersion Science and Technology*, 2023, **44**, 2587-2598.
22. Z. Zaheer, A.-A. Aisha and E. S. Aazam, *Journal of Molecular Liquids*, 2019, **283**, 287-298.
23. Y. Dessie, S. Tadesse and Y. Adimasu, *Chemical Engineering Journal Advances*, 2022, **10**, 100283.
24. Z. U. Zango, N. H. H. Abu Bakar, W. L. Tan and M. A. Bakar, *Journal of Dispersion Science and Technology*, 2018, **39**, 148-154.
25. N. Noorani and A. Mehrdad, *Scientific Reports*, 2023, **13**, 3227.
26. N. Daud, *Materials Today: Proceedings*, 2023.
27. H. An, W. Tian, X. Lu, H. Yuan, L. Yang, H. Zhang, H. Shen and H. Bai, *Chemical Engineering Journal*, 2023, 144052.
28. B. Li, Z. Zhang, Y. Li, K. Yao, Y. Zhu, Z. Deng, F. Yang, X. Zhou, G. Li and H. Wu, *Angewandte Chemie International Edition*, 2012, **51**, 1412-1415.
29. A. López-Olvera, E. Sánchez-González, A. Campos-Reales-Pineda, A. Aguilar-Granda, I. A. Ibarra and B. Rodríguez-Molina, *Inorganic Chemistry Frontiers*, 2017, **4**, 56-64.
30. A. O. Yazaydin, R. Q. Snurr, T.-H. Park, K. Koh, J. Liu, M. D. LeVan, A. I. Benin, P. Jakubczak, M. Lanuza and D. B. Galloway, *Journal of the American Chemical Society*, 2009, **131**, 18198-18199.
31. C. P. Cabello, P. Rumori and G. T. Palomino, *Microporous and Mesoporous Materials*, 2014, **190**, 234-239.
32. Z. Li, Z. Cao, C. Grande, W. Zhang, Y. Dou, X. Li, J. Fu, N. Shezad, F. Akhtar and A. Kaiser, *RSC advances*, 2022, **12**, 664-670.
33. A. M. Fracaroli, H. Furukawa, M. Suzuki, M. Dodd, S. Okajima, F. Gándara, J. A. Reimer and O. M. Yaghi, *Journal of the American Chemical Society*, 2014, **136**, 8863-8866.
34. X. Su, L. Bromberg, V. Martis, F. Simeon, A. Huq and T. A. Hatton, *ACS applied materials & interfaces*, 2017, **9**, 11299-11306.
35. Y. Chen, D. Lv, J. Wu, J. Xiao, H. Xi, Q. Xia and Z. Li, *Chemical Engineering Journal*, 2017, **308**, 1065-1072.
36. W. Huang, X. Zhou, Q. Xia, J. Peng, H. Wang and Z. Li, *Industrial & Engineering Chemistry Research*, 2014, **53**, 11176-11184.
